# Supplementary material for: Synthesis, DFT, Biological and Molecular Docking Analysis of Novel Manganese(II), Iron(III), Cobalt(II), Nickel(II), and Copper(II) Chelate Complexes Ligated by 1-(4-Nitrophenylazo)-2-naphthol
Source: MDPI journal article supplement (doi:10.3390/ijms232415614), 2022-12-09
Supplement: s1 [file s1]

## Supporting data

# Synthesis, DFT, biological and molecular docking analysis of novel manganese(II), iron(III), cobalt(II), nickel(II), and copper(II) chelate complexes ligated by 1-(4-nitrophenylazo)-2-naphthol

Yousef A. A. Alghuwainem<sup>1</sup>, Hany M Abd El-Lateef<sup>2,3\*</sup>, Mai M Khalaf<sup>2,3</sup>, Amer A. Amer<sup>3</sup>, Antar A. Abdelhamid<sup>3,4</sup>, Ahmed A. Alzharani<sup>4</sup>, Anas Alfarsi<sup>4</sup>, Saad Shaaban<sup>2,5\*</sup>, Mohamed Gouda<sup>1</sup>, Aly Abdou<sup>3</sup>

<sup>1</sup>Department of Veterinary public health and care, College of Veterinary Medicine, King Faisal University, Al-Ahsa 31982, Saudi Arabia

<sup>2</sup>Department of Chemistry, College of Science, King Faisal University, Al-Ahsa 31982, Saudi Arabia

<sup>3</sup> Department of Chemistry, Faculty of Science, Sohag University, Sohag 82534, Egypt

<sup>4</sup> Department of chemistry, faculty of science, Albaha University, Albaha, Saudi Arabia

<sup>5</sup> Chemistry Department, Faculty of Science, Mansoura University, Mansoura 35516, Egypt

\* Corresponding authors: hmahmed@kfu.edu.sa, hany\_shubra@science.sohag.edu.eg (H. M. Abd El-Lateef), Sibrahim@kfu.edu.sa (S. Shaaban).

List of Figures;

Figure S1:  $^1\text{H}$ -NMR and  $^{13}\text{C}$ -NMR of the azo-ligand (HL)

Figure S2: mass spectral of the subject complexes

Figure S3: The UV-vis. Spectra of the free ligand and its complexes.

Figure S4: Determination of composition of the metal complexes by jobs method of continuous variation method

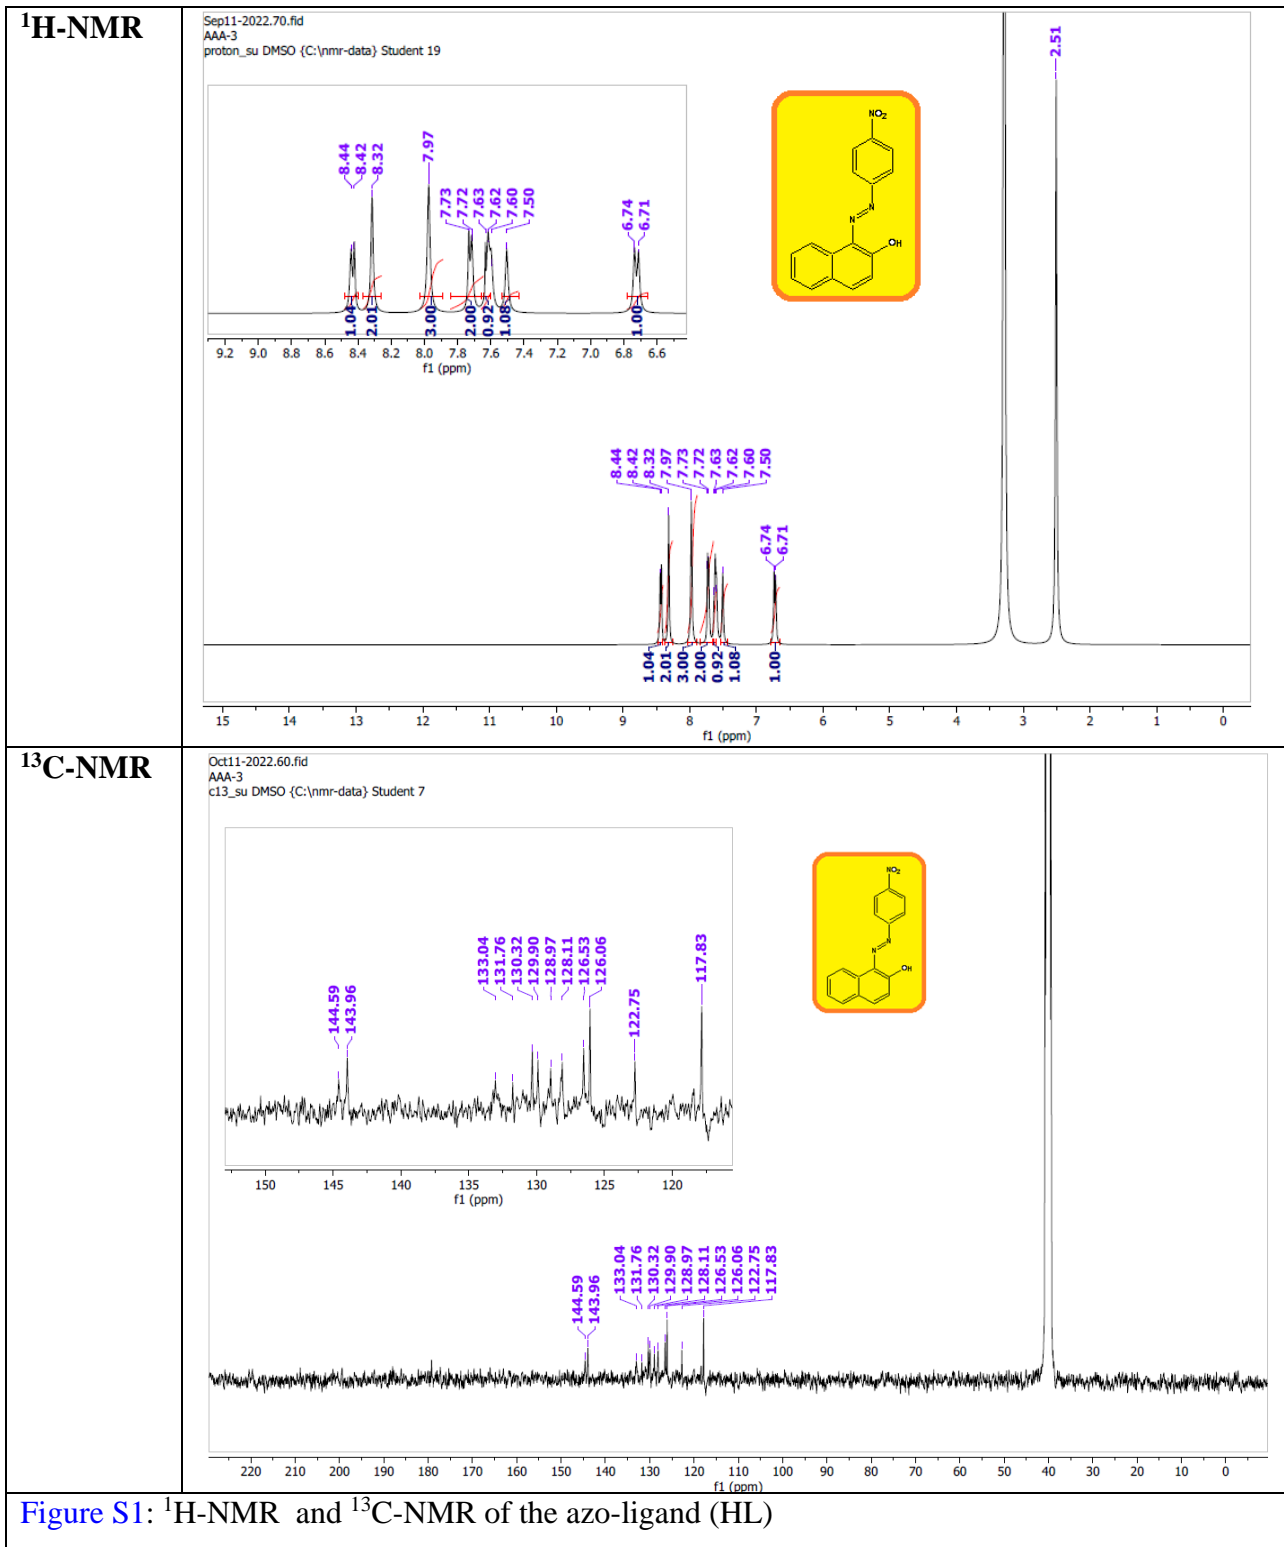

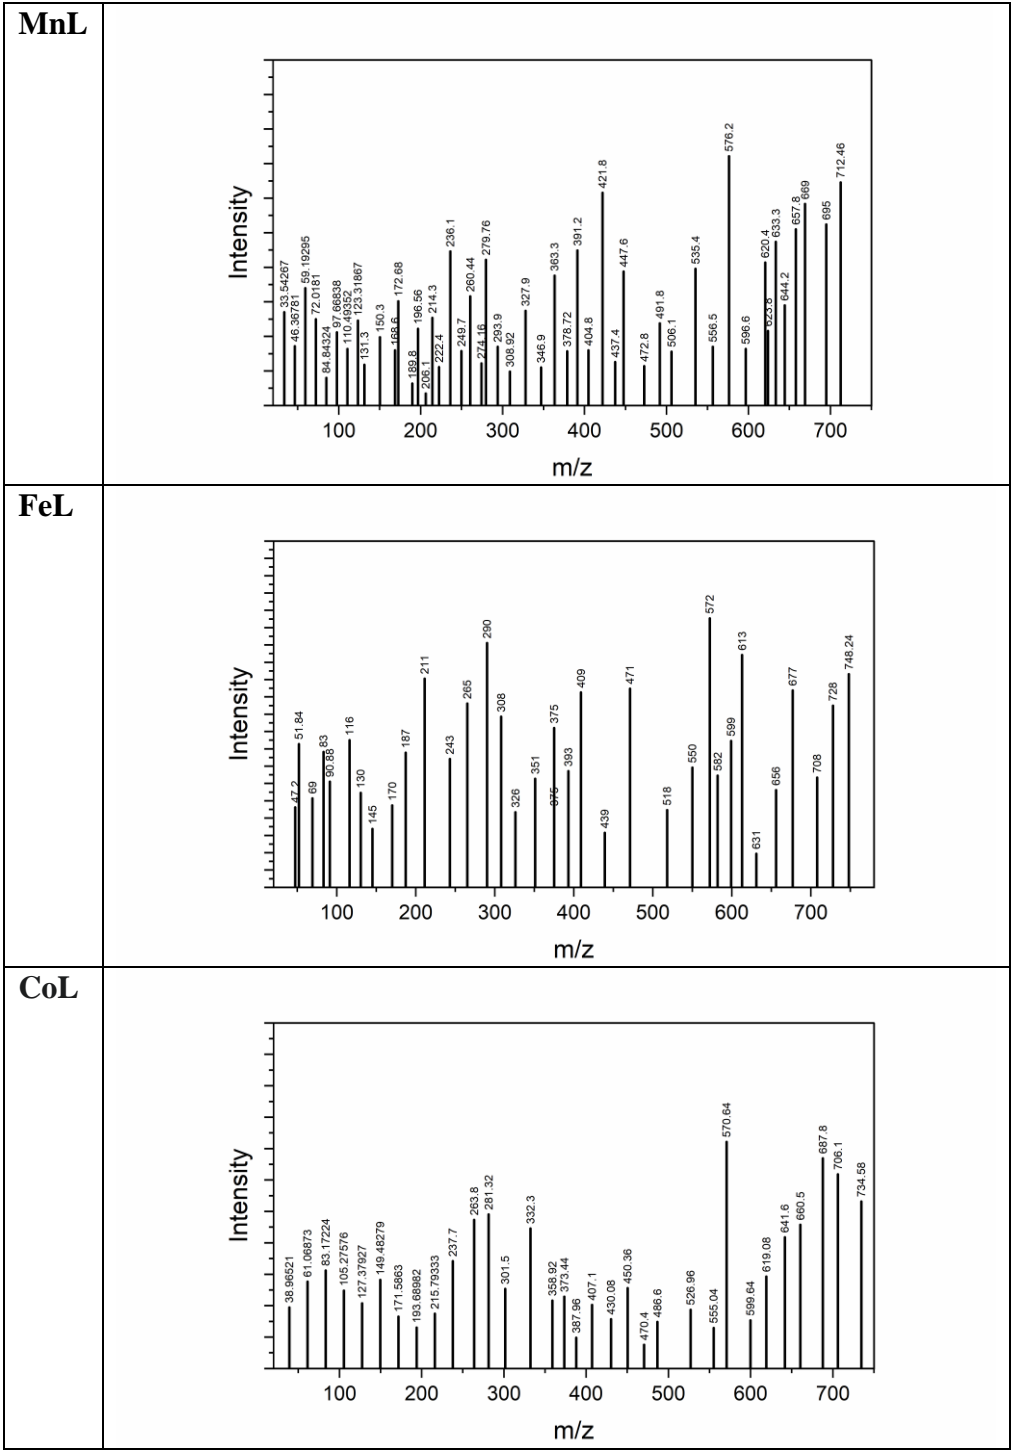

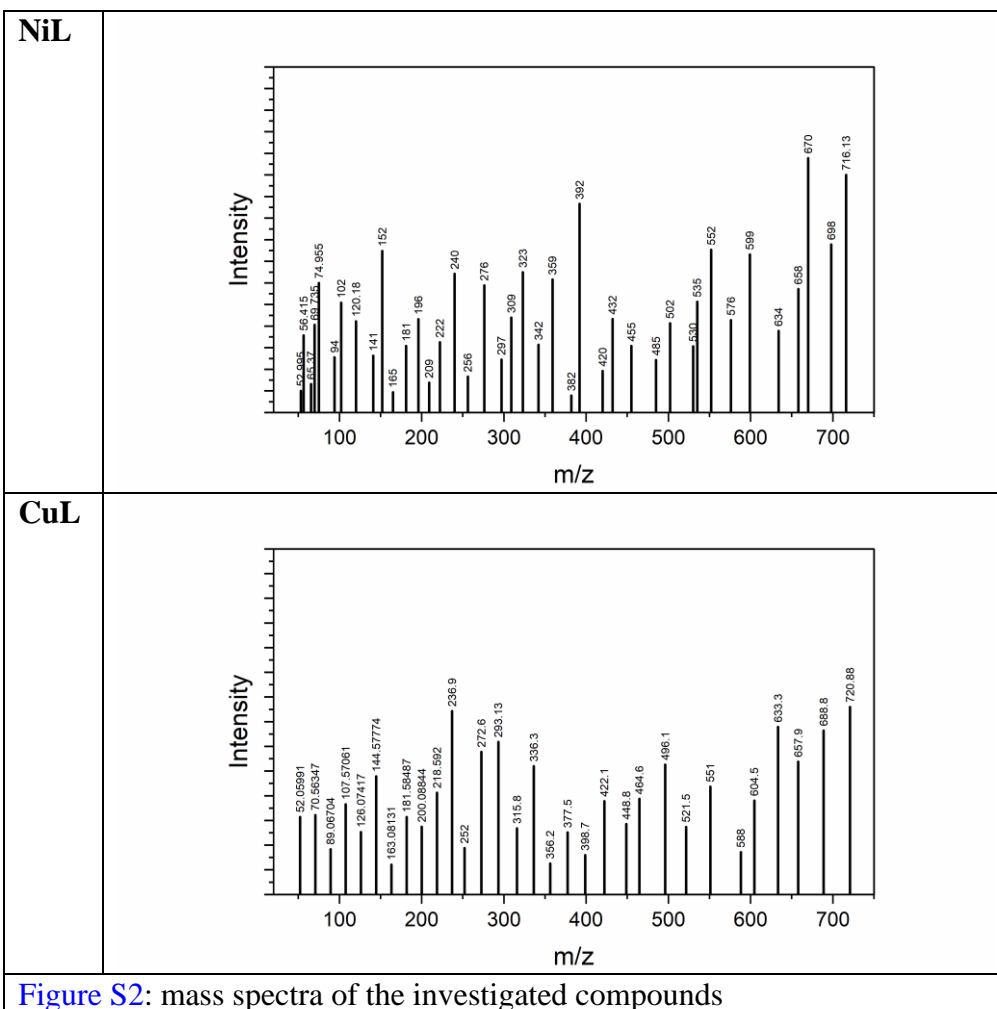

**Figure S2:** mass spectra of the investigated compounds

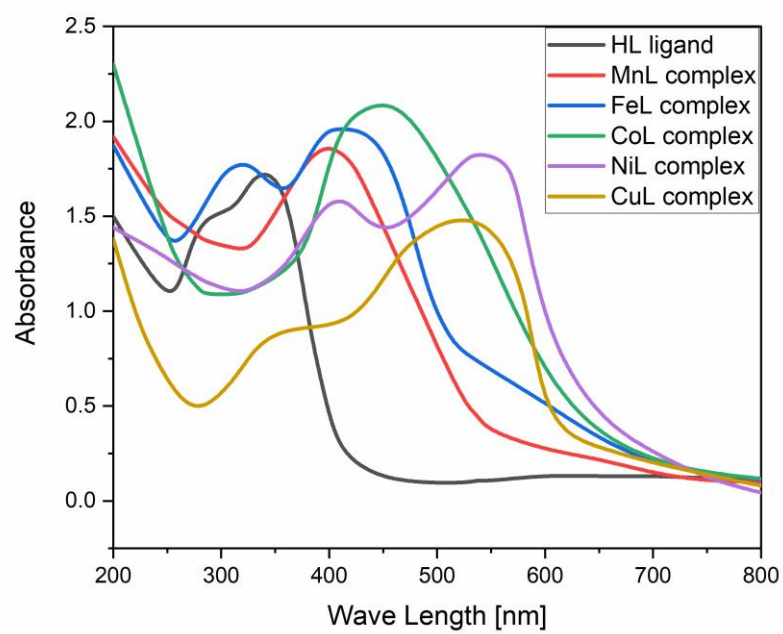

Figure S3: Electronic spectra

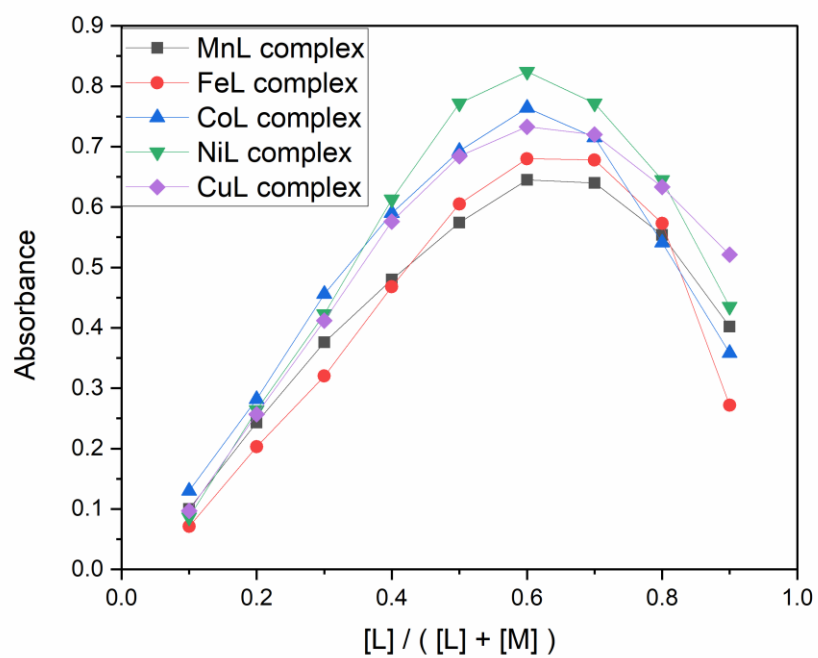

Figure S4: Determination of composition of the metal complexes by continuous variation method

**Table S1:** Comparison between the minimum inhibition concentration (MIC) of the current compounds with previously reported compounds in the literature survey against e. coli.

|    | <b>E. coli (G<sup>-</sup>)</b>       |             |
|----|--------------------------------------|-------------|
|    |                                      | <b>MIC</b>  |
| 1  | <b>MnL</b> [This work]               | <b>6.25</b> |
| 2  | <b>FeL</b> [This work]               | <b>12.5</b> |
| 3  | <b>CoL</b> [This work]               | <b>12.5</b> |
| 4  | <b>NiL</b> [This work]               | <b>25</b>   |
| 5  | <b>CuL</b> [This work]               | <b>12.5</b> |
| 6  | <b>FeL</b> [1]                       | 50.00       |
| 7  | <b>CoL</b> [1]                       | 55.00       |
| 8  | <b>NiL</b> [1]                       | 60.00       |
| 9  | <b>CuL</b> [1]                       | 50.00       |
| 10 | <b>ZnL</b> [1]                       | 70.00       |
| 11 | <b>FeLQ</b> [2]                      | 25.50       |
| 12 | <b>FeLB</b> [2]                      | 22.50       |
| 13 | <b>FeLI</b> [2]                      | 23.50       |
| 14 | <b>CuLQ</b> [3]                      | 21.50       |
| 15 | <b>CuLB</b> [3]                      | 22.50       |
| 16 | <b>CuLI</b> [3]                      | 22.50       |
| 17 | <b>NiLQ</b> [4]                      | 35.50       |
| 18 | <b>NiLB</b> [4]                      | 34.50       |
| 19 | <b>NiLI</b> [4]                      | 37.50       |
| 20 | <b>complex M<sub>5</sub></b> [36]    | 25          |
| 21 | <b>[Zn(DIPO)Cl<sub>2</sub>]</b> [37] | 80          |
| 22 | <b>[Co(DIPO)Cl<sub>2</sub>]</b> [37] | 60          |
| 23 | <b>Na[Ni(L1)<sub>3</sub>]</b> [38]   | < 20        |
